# Supplementary material for: 3D-printed, configurable, paper-based, and autonomous multi-organ-on-paper platforms
Source: Royal Society of Chemistry journal article supplement (doi:10.1039/d2me00142j), 2022-01-01
Supplement: d2me00142j1.pdf [file d2me00142j1.pdf]

## 3D-Printed, Configurable, Paper-based, Autonomous Multi-Organ-on-Paper Platforms

Hongbin Li †<sup>a, b</sup> Feng Cheng †<sup>a</sup>, Zixuan Wang <sup>a</sup>, Wanlu Li <sup>a</sup>, Juan Antonio Robledo-Lara <sup>a, c</sup>, and Yu Shrike Zhang <sup>\*a</sup>

<sup>a</sup> Division of Engineering in Medicine, Brigham and Women's Hospital, Department of Medicine, Harvard Medical School, Cambridge, MA 02139, USA

<sup>b</sup> College of Light Industry and Textile, Qiqihar University, Qiqihar, Heilongjiang 161000, P. R. China

<sup>c</sup> Departamento de Ingeniería Mecatrónica y Eléctrica, Escuela de Ingeniería y Ciencias, Tecnológico de Monterrey, CP78211 San Luis Potosí, San Luis Potosí, Mexico

† Hongbin Li and Feng Cheng contributed equally to this work.

\* Corresponding Author: [yszhang@research.bwh.harvard.edu](mailto:yszhang@research.bwh.harvard.edu) (Y.S.Z.)

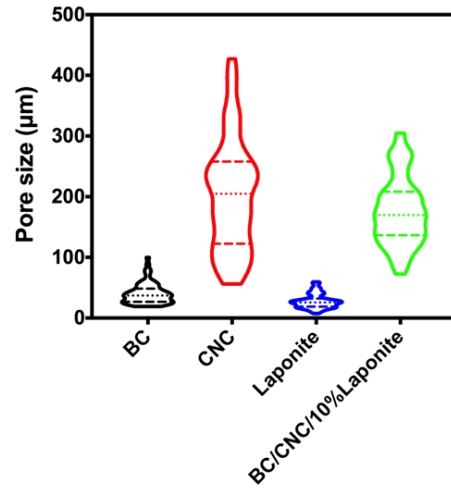

**Fig. S1.** Quantification of the pore sizes of the BC (1 w/v%), CNC (3 w/v%), Laponite (10 w/v%), as well as the mixture of BC (1 w/v%) and CNC (3 w/v%) with Laponite (10 w/v%) after freeze-drying, which were obtained from the SEM images.

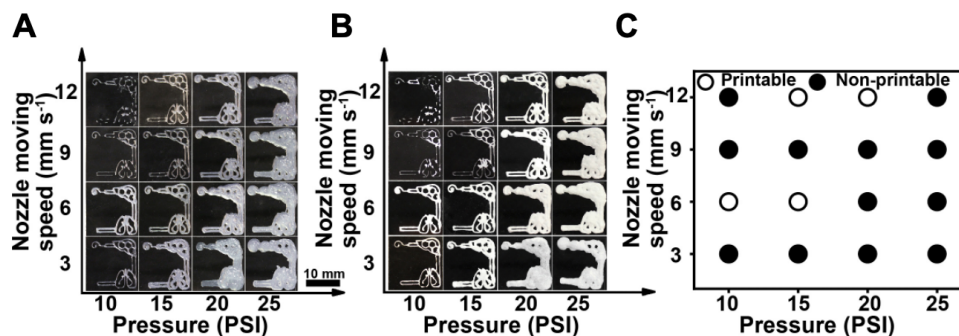

**Fig. S2.** Printability of the BC/CNC/Laponite inks. (A, B) Photographs showing the ink formulation of 1 w/v% BC and 3 w/v% CNC supplemented with 10 w/v% Laponite extruded at different extrusion pressures (10-25 PSI) and nozzle moving speeds (3-12 mm s<sup>-1</sup>), before and after freeze-drying, respectively. (E) Corresponding printability mapping. Open circles: printable; filled circles: non-printable.

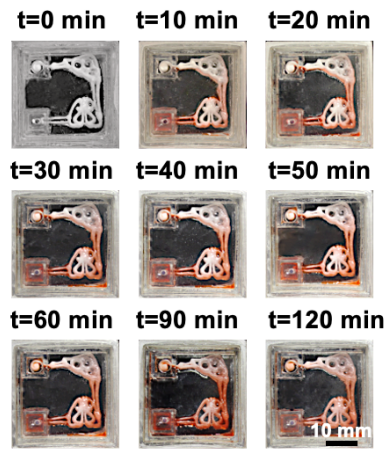

**Fig. S3.** Photographs showing the siphon effect of the liver-lung multi-organ-on-paper platform with three layers of printed structure at the 4 mm of height of the medium reservoir with 3 mm in diameter of the evaporation opening of volatilization chamber at different time points.

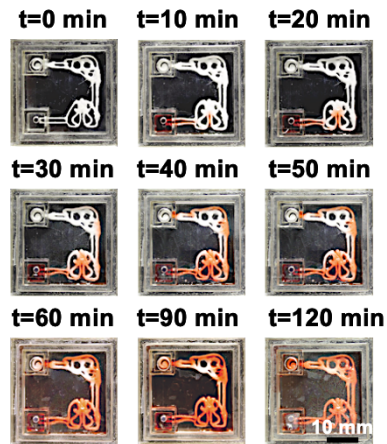

**Fig. S4.** Photographs showing the siphon effect of the liver-lung multi-organ-on-paper platform with three layers of printed structure at the 6 mm of height of the medium reservoir with 3 mm in diameter of the evaporation opening of volatilization chamber at different time points.

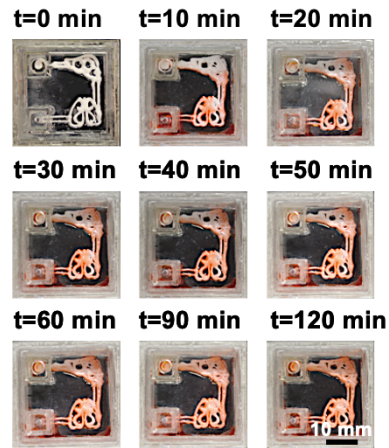

**Fig. S5.** Photographs showing the siphon effect of the liver-lung multi-organ-on-paper platform with three layers of printed structure at the 10 mm of height of the medium reservoir with 3 mm in diameter of the evaporation opening of volatilization chamber at different time points.

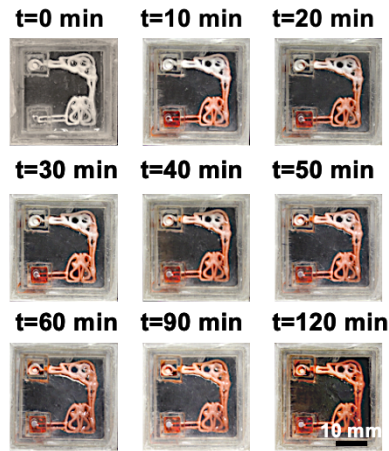

**Fig. S6.** Photographs showing the siphon effect of the liver-lung multi-organ-on-paper platform with three layers of printed structure at the 6 mm of height of the medium reservoir with 2 mm in diameter of the evaporation opening of volatilization chamber at different time points.

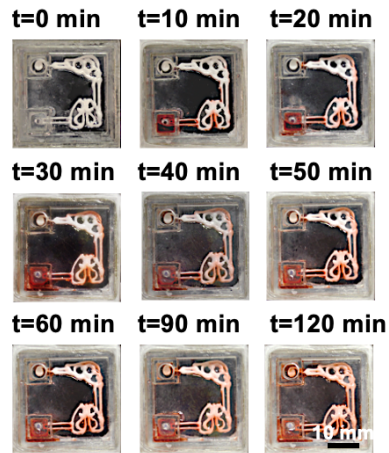

**Fig. S7.** Photographs showing the siphon effect of the liver-lung multi-organ-on-paper platform with three layers of printed structure at the 6 mm of height of the medium reservoir with 4 mm in diameter of the evaporation opening of the volatilization chamber at different time points.



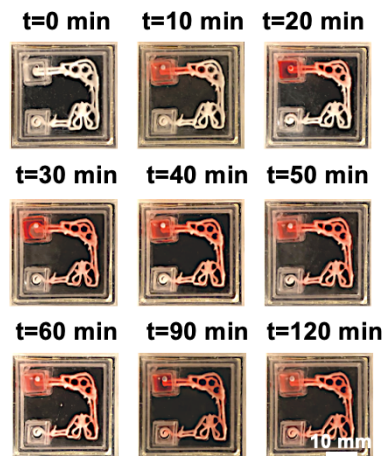

**Fig. S8.** Photographs showing the siphon effect of the liver-lung multi-organ-on-paper platform with five layers of printed structure at the 6 mm of height of the medium reservoir with 3 mm in diameter of the evaporation opening of the volatilization chamber at different time points.

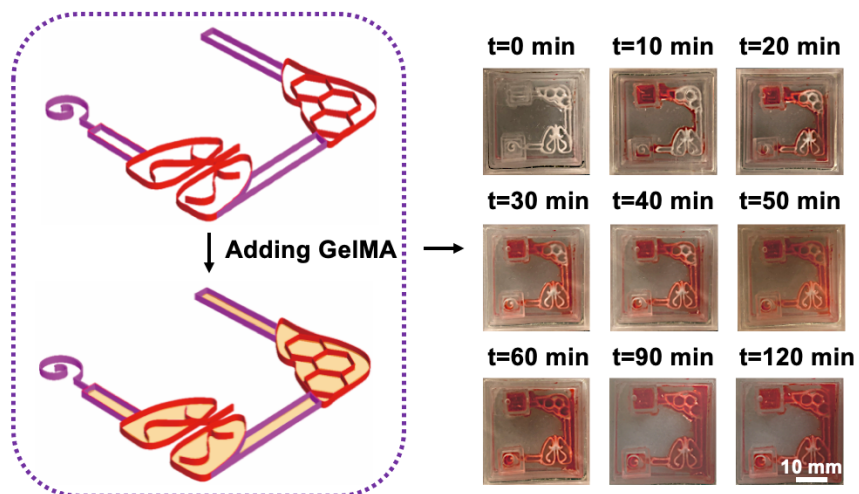

**Fig. S9.** Photographs showing the siphon effect of the liver-lung multi-organ-on-paper platform with three layers of printed structure loaded with the GelMA hydrogel at the 6 mm of height of the medium reservoir with 3 mm in diameter of the evaporation opening of volatilization chamber at different time points.

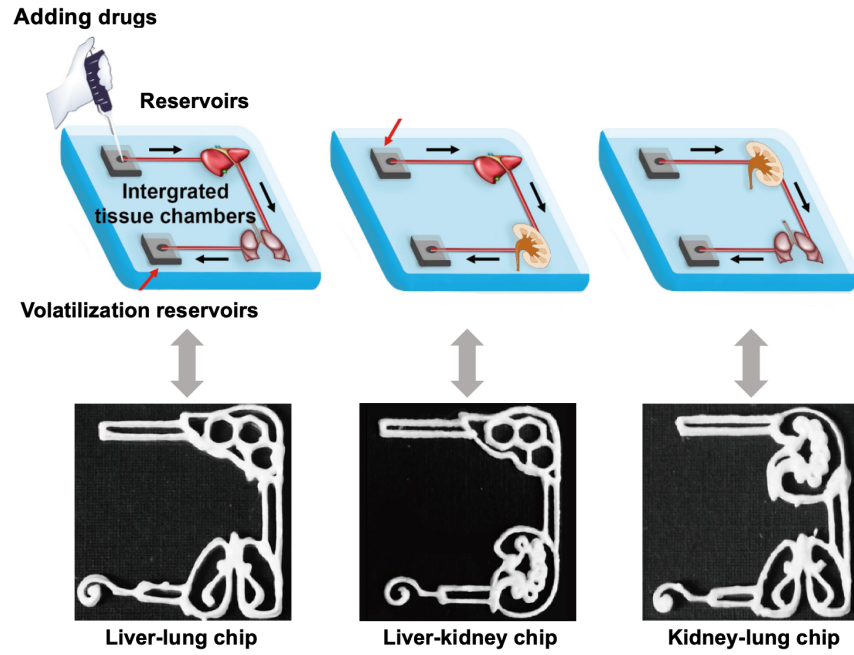

**Fig. S10.** Schematic diagram showing the operation principle of the multi-organ-on-a-chip platforms.

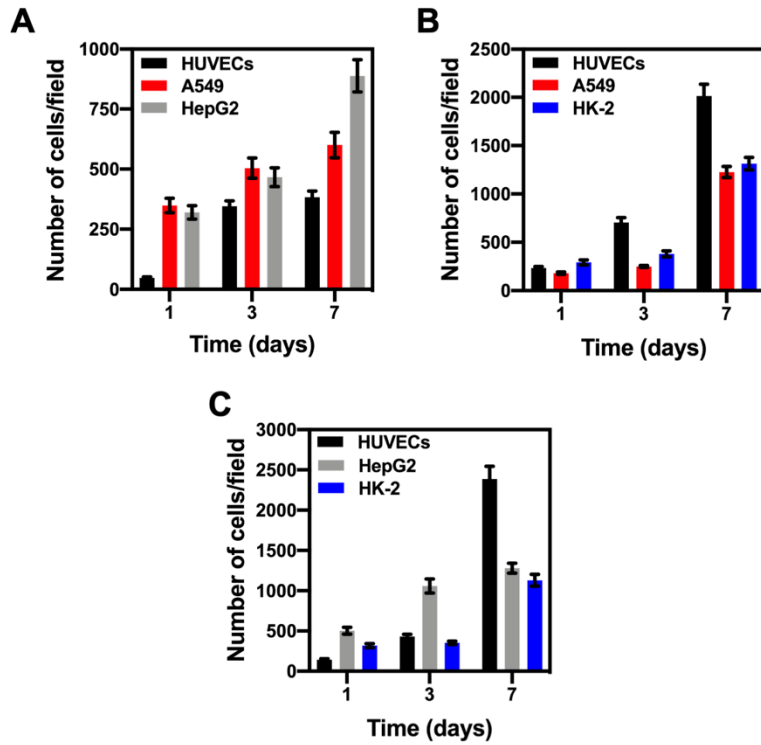

**Fig. S11.** Quantitative analyses of the numbers of HepG2 cells, A549 cells, and HUVECs at 1, 3, and 7 days of culture in (A) the liver-lung chip, (B) the kidney-lung chip, and (C) the liver-kidney chip. The area of the field in the images was 1.21 mm<sup>2</sup>.

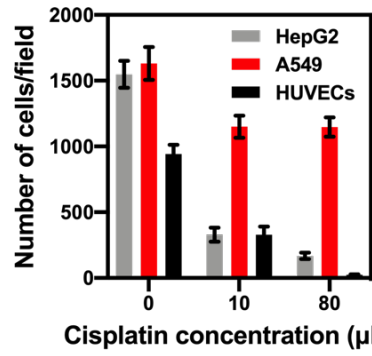

**Fig. S12.** Quantitative analyses of the numbers of HepG2 cells, A549 cells, and HUVECs cells treated with different concentrations of cisplatin (0-80  $\mu\text{M}$ ) in the liver-lung chips. The area of the field in the image was 1.21  $\text{mm}^2$ .

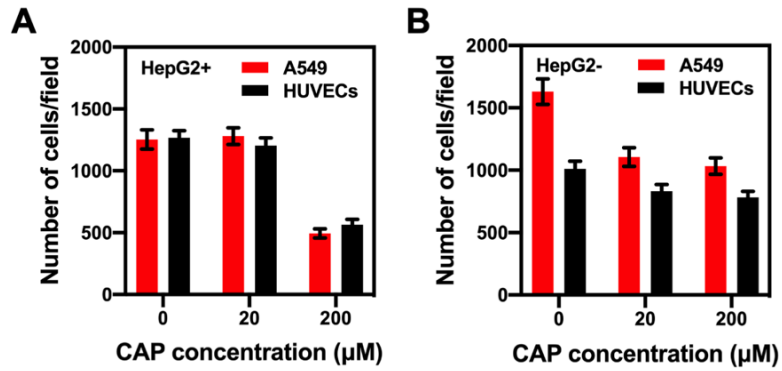

**Fig. S13.** Quantitative analyses of the numbers of A549 cells and HUVECs cells treated with different concentration of CAP (0-200  $\mu\text{M}$ ) metabolized or not metabolized by HepG2 cells in the liver-lung chips. (A) CAP metabolized by HepG2 cells. (B) CAP not metabolized by HepG2 cells. The area of the field in the images was 1.21  $\text{mm}^2$ .
